# Supplementary material
Source: ML conference proceedings conference paper supplement (https://openreview.net/forum?id=8wtaJ9dE9Y2)
Supplement: supplementary_material [file attachment]

---

# Predicting Label Distribution from Multi-label Ranking

---

Yunan Lu, Xiuyi Jia

School of Computer Science and Engineering  
Nanjing University of Science and Technology, Nanjing 210094, China  
{luyn, jiaxy}@njjust.edu.cn

## A Appendix

### A.1 Proof of Theorem 1

**Theorem 1** *If an instance is annotated by a multi-label ranking  $\sigma$ ,  $m$  is the number of relevant labels,  $\delta$  and  $\hat{\delta}$  are the implicit and explicit margins, respectively, then the EAE of  $\sigma$  is*

$$\epsilon_{\sigma}^{\delta, \hat{\delta}} = \frac{m}{6(m+1)} \left( (m+1)^2(\delta^2 + \hat{\delta}^2) - 2m(\delta + \hat{\delta}) - (4m+2)\delta\hat{\delta} + 2 \right). \quad (1)$$

*Proof.* The expected approximation error arising from multi-label ranking comes mainly from the relevant labels, hence we only need to consider the relevant labels. We denote the number of relevant labels as  $m$ , the true importance degree of label  $y_{\sigma_i}$  as  $s_i$ , and the estimated importance degree of label  $y_{\sigma_i}$  as  $\hat{s}_i$ . In order to ensure that  $\forall i \in [m], s_i \in [\delta, 1]$ , we must have  $\forall i \in [m-1], s_i \in [i\delta, s_{i+1} - \delta]$  and  $s_m \in [m\delta, 1]$ . Similarly,  $\forall i \in [m-1], \hat{s}_i \in [i\hat{\delta}, \hat{s}_{i+1} - \hat{\delta}]$  and  $\hat{s}_m \in [m\hat{\delta}, 1]$ . Therefore, we can obtain the volume of the space  $\mathcal{S}_{\sigma}^{\hat{\delta}}$ :

$$V_{\sigma}^{\hat{\delta}} = \int_{m\hat{\delta}}^1 \int_{(m-1)\hat{\delta}}^{s_m - \hat{\delta}} \cdots \int_{\hat{\delta}}^{s_2 - \hat{\delta}} ds_1 \cdots ds_{m-1} ds_m. \quad (2)$$

We use the mathematical induction method to calculate  $V_{\sigma}^{\hat{\delta}}$ . By observing the calculation results for the cases  $m = 1, 2, 3, 4$ , we make the following conjecture:

$$F_1(k) = \int_{(k-1)\hat{\delta}}^{s_k - \delta} \int_{(k-2)\hat{\delta}}^{s_{k-1} - \delta} \cdots \int_{\hat{\delta}}^{s_2 - \delta} ds_1 \cdots ds_{k-2} ds_{k-1} = \frac{(s_k - k\hat{\delta})^{k-1}}{(k-1)!}. \quad (3)$$

It is obvious that Eq. (3) holds for  $k = 2$ . For  $k + 1$ , we have:

$$F_1(k+1) = \int_{k\hat{\delta}}^{s_{k+1} - \hat{\delta}} \frac{(s_k - k\hat{\delta})^{k-1}}{(k-1)!} ds_k = \frac{(s_{k+1} - (k+1)\hat{\delta})^k}{k!}. \quad (4)$$

Therefore, Eq. (3) holds for  $k = 2, 3, \dots$ . Then we can obtain  $V_{\sigma}^{\hat{\delta}} = \frac{(1-m\hat{\delta})^m}{m!}$  by substituting  $s_{k+1}$  in Eq. (4) for  $1 + \hat{\delta}$ . Similarly, we have  $V_{\sigma}^{\delta} = \frac{(1-m\delta)^m}{m!}$ . Next we use the same idea to integrate the squared Euclidean distance between  $[s_i]_{i=1}^m$  and  $[\hat{s}_i]_{i=1}^m$ . By observing the calculation results for the cases  $m = 1, 2, 3, 4$ , we make the following conjecture:

$$\begin{aligned} F_2(k) &= \int_{(k-1)\delta}^{s_k - \delta} \cdots \int_{\delta}^{s_2 - \delta} \int_{(k-1)\hat{\delta}}^{s_k - \hat{\delta}} \cdots \int_{\hat{\delta}}^{s_2 - \hat{\delta}} \sum_{i=1}^{k-1} (s_i - \hat{s}_i)^2 d\hat{s}_1 d\hat{s}_{k-1} ds_1 ds_{k-1} \\ &= \frac{\left( (k\delta - s_k)(k\hat{\delta} - s_k) \right)^{k-1}}{6k!(k-2)!} \left( k^2(\delta^2 + \hat{\delta}^2) + 2k(s_k^2 + \hat{s}_k^2 - \delta s_k - \hat{\delta} \hat{s}_k) - (4k-2)\hat{s}_k s_k \right). \end{aligned} \quad (5)$$

It is obvious that Eq. (5) holds for  $k = 2$ . For  $k + 1$ , we have:

$$\begin{aligned} F_2(k+1) &= \int_{k\delta}^{s_{k+1}-\delta} \int_{k\hat{\delta}}^{\hat{s}_{k+1}-\hat{\delta}} F_2(k) ds_k d\hat{s}_k \\ &= \frac{\left( ((k+1)\delta - s_{k+1})((k+1)\hat{\delta} - \hat{s}_{k+1}) \right)^k}{6(k+1)!(k-1)!} \cdot \left( (k+1)^2(\delta^2 + \hat{\delta}^2) \right. \\ &\quad \left. + 2(k+1)(s_{k+1}^2 + \hat{s}_{k+1}^2 - \delta s_{k+1} - \hat{\delta} \hat{s}_{k+1}) - (4k+2)\hat{s}_{k+1}s_{k+1} \right). \end{aligned} \quad (6)$$

Therefore, Eq. (5) holds for  $k = 2, 3, \dots$ . By substituting  $s_{k+1}$  and  $\hat{s}_{k+1}$  for  $1 + \delta$  and  $1 + \hat{\delta}$ , respectively, we have:

$$\begin{aligned} \int_{z \in \mathcal{S}_\sigma^\delta} \int_{\hat{z} \in \mathcal{S}_\sigma^{\hat{\delta}}} \|z - \hat{z}\|_2^2 d\hat{z} dz &= \frac{\left( (1-m\delta)(1-m\hat{\delta}) \right)^m}{6(m+1)!(m-1)!} \cdot \left( (m+1)^2(\delta^2 + \hat{\delta}^2) \right. \\ &\quad \left. - 2m(\delta + \hat{\delta}) - (4m+2)\delta\hat{\delta} + 2 \right). \end{aligned} \quad (7)$$

Therefore, Eq. (1) can be obtained by combining Eq (7) and  $V_\sigma^\delta V_\sigma^{\hat{\delta}} = \frac{(1-m\delta)^m(1-m\hat{\delta})^m}{(m!)^2}$ .  $\square$

## A.2 Proof of Lemma 1

**Lemma 1** *If an instance is annotated by a multi-label ranking  $\sigma$ , then the margins  $\delta$  and  $\hat{\delta}$  satisfy that  $0 \leq \delta \leq m^{-1}$  and  $0 \leq \hat{\delta} \leq m^{-1}$ .*

*Proof.* To ensure  $\mathcal{S}_\sigma^\delta \neq \emptyset$ , we can obtain that there is at least one label importance vector  $z$  satisfying  $(\forall k \in \sigma, z_k \in [\delta, 1]) \wedge (\forall i \in [|\sigma| - 1], z_{\sigma_i} \geq z_{\sigma_{i+1}} - \delta) \wedge (\forall j \in [M] \setminus \sigma, z_j = 0)$ . Accordingly, we can obtain

$$\delta \leq z_{\sigma_1} \leq z_{\sigma_2} - \delta \leq z_{\sigma_3} - 2\delta \leq \dots \leq z_{\sigma_m} - (m-1)\delta \leq 1 - (m-1)\delta.$$

Therefore,  $\delta \leq 1 - (m-1)\delta$ , i.e.,  $\delta \leq \frac{1}{m}$ . Similarly,  $\hat{\delta} \leq \frac{1}{m}$ .  $\square$

## A.3 Proof of Corollary 1

**Corollary 1** *If an instance is annotated by a multi-label ranking  $\sigma$ ,  $m$  is the number of relevant labels, the explicit margin  $\hat{\delta}^*$  minimizing the EAE of  $\sigma$  is  $\hat{\delta}^* = ((2m+1)\delta + m)(m+1)^{-2}$ .*

*Proof.* It is obvious that  $\epsilon_\sigma^{\delta, \hat{\delta}}$  is a quadratic function of  $\hat{\delta}$  and the second order derivative of  $\epsilon_\sigma^{\delta, \hat{\delta}}$  w.r.t.  $\hat{\delta}$  is a positive number, hence the only stationary point  $\hat{\delta}^*$  of  $\epsilon_\sigma^{\delta, \hat{\delta}}$ , i.e.,  $\hat{\delta}^* = \frac{(2m+1)\delta + m}{(m+1)^2}$ , is the optimal one that minimizes the expected approximation error.  $\square$

## A.4 Proof of Corollary 2

**Corollary 2** *If an instance is annotated by a multi-label ranking  $\sigma$ ,  $m$  is the number of relevant labels,  $0 \leq \delta \leq m^{-1}$ ,  $m(m+1)^{-2} \leq \hat{\delta} \leq m^{-1}$ , then the EAE of  $\sigma$  is bounded by:*

$$0 \leq \epsilon_\sigma^{\delta, \hat{\delta}} \leq \frac{m(m^2 + 4m + 2)}{6(m+1)^3} < \frac{1}{5}. \quad (8)$$

*Proof.* It is obvious that  $\epsilon_\sigma^{\delta, \hat{\delta}} \geq 0$  holds, and  $\lim_{\delta \rightarrow \frac{1}{m}, \hat{\delta} \rightarrow \frac{1}{m}} \epsilon_\sigma^{\delta, \hat{\delta}} = 0$ . Since  $\epsilon_\sigma^{\delta, \hat{\delta}} \geq 0$  is a quadratic function of  $\hat{\delta}$  and  $\delta$ , and the second order derivative  $\partial^2 \epsilon_\sigma^{\delta, \hat{\delta}} / \partial \hat{\delta}^2 > 0$  and  $\partial \epsilon_\sigma^{\delta, \hat{\delta}} / \partial \delta > 0$ , the maximum value of  $\epsilon_\sigma^{\delta, \hat{\delta}}$  is taken at the boundary of  $\delta$  and  $\hat{\delta}$ . Therefore, we only need to check the following four equations, the largest of which is the maximum value of  $\epsilon_\sigma^{\delta, \hat{\delta}}$ :

$$\begin{aligned} \epsilon_\sigma^{\delta, \hat{\delta}} \Big|_{\delta=0, \hat{\delta}=\frac{m}{(m+1)^2}} &= \frac{m(m^2 + 4m + 2)}{6(m+1)^3}, & \epsilon_\sigma^{\delta, \hat{\delta}} \Big|_{\delta=\frac{1}{m}, \hat{\delta}=\frac{1}{m}} &= 0, \\ \epsilon_\sigma^{\delta, \hat{\delta}} \Big|_{\delta=\frac{1}{m}, \hat{\delta}=\frac{m}{(m+1)^2}} &= \frac{(2m+1)^2}{6m(m+1)^3}, & \epsilon_\sigma^{\delta, \hat{\delta}} \Big|_{\delta=0, \hat{\delta}=\frac{1}{m}} &= \frac{m+1}{6m}. \end{aligned} \quad (9)$$

Obviously,  $\epsilon_{\sigma}^{\delta, \hat{\delta}}$  takes the maximum value when  $\delta = 0$  and  $\hat{\delta} = \frac{m}{(m+1)^2}$ , i.e.,  $\epsilon_{\sigma}^{\delta, \hat{\delta}} \leq \frac{m(m^2+4m+2)}{6(m+1)^3}$ . Further, it is easy to verify that the following formula holds for any positive integer  $m$ :

$$5m^3 + 20m^2 + 10m < 6m^3 + 18m^2 + 18m + 6, \quad (10)$$

then we have  $\frac{m(m^2+4m+2)}{6(m+1)^3} < \frac{1}{5}$ . Therefore, the formula (8) is proved.  $\square$

## A.5 Proof of Theorem 2

**Theorem 2** *If an instance is annotated by a logical label vector  $\mathbf{l}$ ,  $m$  is the number of relevant labels,  $\delta$  and  $\hat{\delta}$  are the implicit and explicit margins, respectively, then the EAE of  $\mathbf{l}$  is*

$$\epsilon_{\mathbf{l}}^{\delta, \hat{\delta}} = \frac{m}{6}(2\delta^2 + 2\hat{\delta}^2 - \delta - \hat{\delta} - 3\delta\hat{\delta} + 1). \quad (11)$$

*Proof.* The expected approximation error arising from logical labels comes mainly from labels with a logical value of 1, hence we consider only the relevant labels. We denote the number of relevant labels as  $m$ , i.e.,  $m = \sum_{i=1}^M \mathbb{I}(l_i = 1)$ . We first calculate  $V_{\mathbf{l}}^{\hat{\delta}}$ :

$$V_{\mathbf{l}}^{\hat{\delta}} = \int_{\hat{\delta}}^1 \int_{\hat{\delta}}^1 \cdots \int_{\hat{\delta}}^1 dz_1 dz_2 \cdots dz_m = (1 - \hat{\delta})^m. \quad (12)$$

In the same way, we can obtain  $V_{\mathbf{l}}^{\delta} = (1 - \delta)^m$ . In the following we integrate the squared Euclidean distance between  $\mathbf{z}$  and  $\hat{\mathbf{z}}$ :

$$\begin{aligned} \int_{\mathbf{z} \in S_{\mathbf{l}}^{\delta}} \int_{\hat{\mathbf{z}} \in S_{\mathbf{l}}^{\hat{\delta}}} \sum_{i=1}^m (z_i - \hat{z}_i)^2 d\hat{\mathbf{z}} d\mathbf{z} &= \int_{\delta}^1 \cdots \int_{\delta}^1 \int_{\delta}^1 \cdots \int_{\delta}^1 \sum_{i=1}^m (z_i - \hat{z}_i)^2 dz_1 \cdots dz_m d\hat{z}_1 \cdots d\hat{z}_m \\ &= \frac{m}{6}(1 - \delta)^m (1 - \hat{\delta})^m (2\delta^2 + 2\hat{\delta}^2 - \delta - \hat{\delta} - 3\delta\hat{\delta} + 1). \end{aligned} \quad (13)$$

Finally, we can obtain the EAE of  $\mathbf{l}$  by combining Eq. (12) and Eq. (13).  $\square$

## A.6 Proof of Corollary 3

**Corollary 3** *If an instance is annotated by a multi-label ranking  $\sigma$ ,  $m$  is the number of relevant labels,  $\delta$  and  $\hat{\delta}$  are uniform over  $[0, m^{-1}]$  and  $[m(m+1)^{-2}, m^{-1}]$ , respectively, then we have:*

$$\mathbb{E}_{\delta, \hat{\delta}} \left[ \epsilon_{\sigma}^{\delta, \hat{\delta}} \right] = \frac{2m^4 + 8m^3 + 8m^2 + 4m + 1}{36m(m+1)^3}. \quad (14)$$

*Proof.*

$$\begin{aligned} \mathbb{E}_{\delta, \hat{\delta}} \left[ \epsilon_{\sigma}^{\delta, \hat{\delta}} \right] &= m \left( \frac{1}{m} - \frac{m}{(m+1)^2} \right)^{-1} \int_0^{\frac{1}{m}} \int_{\frac{m}{(m+1)^2}}^{\frac{1}{m}} \text{Eq. (1)} d\hat{\delta} d\delta \\ &= \frac{2m^4 + 8m^3 + 8m^2 + 4m + 1}{36m(m+1)^3}. \end{aligned} \quad (15)$$

$\square$

## A.7 Proof of Corollary 4

**Corollary 4** *Suppose that  $\epsilon_{\mathbf{l}}^{\delta, \hat{\delta}_i}$  and  $\epsilon_{\sigma}^{\delta, \hat{\delta}_\sigma}$  are the EAE of the logical label vector  $\mathbf{l}$  and the EAE of the multi-label ranking  $\sigma$ , respectively, we have the following inequality holds for  $m \geq 3$ :*

$$\begin{aligned} \epsilon_{\mathbf{l}}^{\delta, \hat{\delta}_i} - \epsilon_{\sigma}^{\delta, \hat{\delta}_\sigma} &\geq \frac{7m}{48}(\delta^2 - 2\delta) + \frac{m(m-1)(7m^2 + 20m + 9)}{48(m+1)^3} \\ &> \frac{7m^5 - m^4 - 46m^3 - 30m^2 + 7m + 7}{48m(m+1)^3} > 0. \end{aligned} \quad (16)$$

*Proof.* Since  $\epsilon_l^{\delta, \hat{\delta}_l}$  is a quadratic function of  $\hat{\delta}_l$  and the coefficient of the quadratic term is a positive number, the minimum value of  $\epsilon_l^{\delta, \hat{\delta}_l}$  w.r.t.  $\hat{\delta}_l$  is  $\frac{7m(\delta-1)^2}{48}$ . According to Corollary 2, we have  $\epsilon_{\sigma}^{\delta, \hat{\delta}_{\sigma}} \leq \frac{m(m^2+4m+2)}{6(m+1)^3}$ . Then we have

$$\epsilon_l^{\delta, \hat{\delta}_l} - \epsilon_{\sigma}^{\delta, \hat{\delta}_{\sigma}} \geq \frac{7m}{48}(\delta^2 - 2\delta) + \frac{m(m-1)(7m^2 + 20m + 9)}{48(m+1)^3}. \quad (17)$$

Since  $\delta^2 - 2\delta > \frac{1}{m^2} - \frac{2}{m}$ , we can obtain the Eq (16) by substituting  $\delta$  for  $\frac{1}{m}$ . Obviously,  $\frac{7m^5 - m^4 - 46m^3 - 30m^2 + 7m + 7}{48m(m+1)^3} > 0$  holds for  $m \geq 3$ .  $\square$

## A.8 Details of DRAM

The probability density function of Dirichlet distribution is

$$\text{Dir}(\mathbf{d}|\boldsymbol{\mu}) = \frac{1}{B(\boldsymbol{\mu})} \prod_{i=1}^M d_i^{\mu_i-1}, \quad B(\boldsymbol{\mu}) = \frac{1}{\Gamma(\sum_{i=1}^M \mu_i)} \prod_{i=1}^M \Gamma(\mu_i), \quad \Gamma(\mu) = \int_0^{\infty} x^{\mu-1} e^{-x} dx.$$

The mean of Dirichlet distribution is

$$\mathbb{E}_{\mathbf{d} \sim \text{Dir}(\mathbf{d}|\boldsymbol{\mu})} [\mathbf{d}] = \frac{1}{Z_{\boldsymbol{\mu}}} \boldsymbol{\mu}, \quad Z_{\boldsymbol{\mu}} = \sum_{i=1}^M \mu_i.$$

## A.9 Monte Carlo Approximation for $\mathbb{E}_{p^*(\mathbf{d})} [\ln p(\mathbf{d}|\mathbf{x})]$

Let the importance sampling distribution be  $\tilde{p}(\mathbf{d}) = \frac{1}{Z_{\tilde{p}}} \int_0^{\infty} \mathbb{I}(t\mathbf{d} \in \mathcal{S}_{\sigma}^{\hat{\delta}}) dt$ ; then, the negative cross-entropy can be approximated by:

$$p^*(\mathbf{d})/\tilde{p}(\mathbf{d}) = \frac{\frac{1}{Z_{p^*}} \phi(\mathbf{d}; \boldsymbol{\theta}) \int_0^{\infty} \mathbb{I}(t\mathbf{d} \in \mathcal{S}_{\sigma}^{\hat{\delta}}) dt}{\frac{1}{Z_{\tilde{p}}} \int_0^{\infty} \mathbb{I}(t\mathbf{d} \in \mathcal{S}_{\sigma}^{\hat{\delta}}) dt} = \frac{Z_{\tilde{p}}}{Z_{p^*}} \phi(\mathbf{d}; \boldsymbol{\theta}), \quad (18)$$

$$\mathbb{E}_{p^*(\mathbf{d})} [\ln p(\mathbf{d}|\mathbf{x})] \approx \sum_{i=1}^L \frac{\phi(\mathbf{d}^{(i)}; \boldsymbol{\theta})}{\sum_{j=1}^L \phi(\mathbf{d}^{(j)}; \boldsymbol{\theta})} \ln p(\mathbf{d}^{(i)}|\mathbf{x}).$$

We can draw samples from  $\tilde{p}(\mathbf{d}) = \frac{1}{Z_{\tilde{p}}} \int_0^{\infty} \mathbb{I}(t\mathbf{d} \in \mathcal{S}_{\sigma}^{\hat{\delta}}) dt$  as follows:

$$\mathbf{z}^{(i)} \sim \text{Uni}(\mathbf{z}|\mathcal{S}_{\sigma}^{\hat{\delta}}), \quad \mathbf{d}^{(i)} = \frac{1}{Z^{(i)}} \mathbf{z}^{(i)}. \quad (19)$$

## A.10 Details of Experiments

The information of the datasets we used is shown in Table 1. The first four rows in Table 1 are the existing label distribution datasets; the last three rows in Table 1 are the datasets we created. Since some examples in the original label distribution datasets do not satisfy the prerequisites of our paper (i.e., there are some examples  $(\mathbf{x}, \mathbf{d})$  such that there exist relevant labels with identical label description degrees), we remove these examples from the dataset to obtain such a dataset:  $\{(\mathbf{x}, \mathbf{d}) \in \mathcal{D} | \forall (d_i \neq 0, d_j \neq 0), d_i \neq d_j\}$ , where  $\mathcal{D} = \{(\mathbf{x}_n, \mathbf{d}_n)\}_{n=1}^{N_1}$ . In Table 1,  $N_1 \rightarrow N_2$  means that the original dataset with  $N_1$  instances is reduced to the dataset with  $N_2$  instances. Since the instances in Emotion6, Twitter-LDL and Flickr-LDL are images, we use a VGG16 [2] network pre-trained on ImageNet [1] to extract 1000-dimensional features. For the NSRD dataset, we use the feature vectors suggested in [3]. Besides, we use the random search method as the hyperparameter optimization technique, and the number of searches is set to 30.

## References

- [1] Olga Russakovsky, Jia Deng, Hao Su, Jonathan Krause, Sanjeev Satheesh, Sean Ma, Zhiheng Huang, Andrej Karpathy, Aditya Khosla, Michael S. Bernstein, Alexander C. Berg, and Li Fei-Fei. Imagenet large scale visual recognition challenge. *International Journal of Computer Vision*, 115:211–252, 2015.

Table 1: Statistics of datasets.

| Dataset     | # Instances  | # Features | # Labels |
|-------------|--------------|------------|----------|
| Movie       | 7755 → 6437  | 1869       | 5        |
| Emotion6    | 1980 → 1063  | 1000       | 7        |
| Twitter-LDL | 10045 → 6147 | 1000       | 8        |
| Flickr-LDL  | 11150 → 4212 | 1000       | 8        |
| NSRD-e1     | 2000         | 135        | 9        |
| NSRD-e2     | 2000         | 135        | 9        |
| NSRD-e3     | 2000         | 135        | 9        |

- [2] Karen Simonyan and Andrew Zisserman. Very deep convolutional networks for large-scale image recognition. In *International Conference on Learning Representations*, 2015.
- [3] Zhi-Hua Zhou and Min-Ling Zhang. Multi-instance multi-label learning with application to scene classification. In *Advances in Neural Information Processing Systems*, pages 1609–1616, 2006.
